# Supplementary material for: Programmed delivery of cyclopeptide RA-V and antisense oligonucleotides for combination therapy on hypoxic tumors and for therapeutic self-monitoring
Source: Royal Society of Chemistry journal article supplement (doi:10.1039/c9bm00905a), 2019-10-16
Supplement: c9bm00905a1.pdf [file c9bm00905a1.pdf]

## **Supporting Information**

### **Programmed Delivery of Cyclopeptide RA-V and Antisense Oligonucleotide for**

### **Combination Therapy on Hypoxic Tumors and Therapeutic Self-Monitoring**

Yongrong Yao,<sup>‡</sup> Li Feng,<sup>‡</sup> Zhe Wang, Huachao Chen,\* Ninghua Tan\*

State Key Laboratory of Natural Medicines, Jiangsu Key Laboratory of TCM Evaluation and  
Translational Research, School of Traditional Chinese Pharmacy, China Pharmaceutical University,  
Nanjing 211198, China.

\*Corresponding author, Ninghua Tan, Email: nhtan@cpu.edu.cn; huachao.chen@163.com

<sup>‡</sup>These authors contributed equally

## Additional Figures

1. **Fig. S1.** TEM micrographs of the RA/RX Liposome at pH 5.0, 6.0 and 7.4.
2. **Fig. S2.** Size distribution of the nanoparticle characterized by Malvern Instruments at 25 °C.
3. **Fig. S3.** Zeta distribution of the RA/RX Liposome (without anti-DR5 modification) compared with RA/RX Liposome ( $-29.83 \pm 0.75$  mV), characterized by Malvern Instruments at 25 °C.
4. **Fig. S4.** Zeta distribution of the RA/RX Liposome compared with RA/RX Liposome (without anti-DR5 modification) ( $-44.2 \pm 0.1$  mV), characterized by Malvern Instruments at 25 °C.
5. **Fig. S5.** In vitro release profiles of RX-0047 from the RA/RX Liposome at pH 5.0, 6.0 and 7.4.
6. **Fig. S6.** In vitro release profiles of the caspase 8 probe from the RA/RX Liposome at pH 5.0, 6.0 and 7.4.
7. **Fig. S7.** Quantitative fluorescent intensities data of HCT116 cells fluorescence images in Fig. 3a.
8. **Fig. S8.** Colocalization images of the RX-0047 Liposome in HCT116 cells.
9. **Fig. S9.** Colocalization images of the RA/RX Liposome (non-DR5) in HCT116 cells.
10. **Fig. S10.** Confocal fluorescence images of apoptosis by the JC-1 assay in HCT116 and HT29 cells treated with the RA/RX Liposome for 0 h or 12 h.
11. **Fig. S11.** The blots in Fig.5d were analyzed by optical densitometry using Image J.
12. **Fig. S12.** The levels of HIF-1 $\alpha$  protein in cells upon treatments with different concentrations of the RX-0047 Liposome were also investigated, which were tested in the total cell lysates from HCT 116 cells.
13. **Fig. S13.** Confocal fluorescence images showing increased intracellular O<sub>2</sub> level after treated with the RA/RX Liposome.
14. **Fig. S14.** Tumor weights of different groups of HCT116 cells tumor-bearing nude mice after various administrations.
15. **Fig. S15.** Changes of relative tumor volume upon treatments with different concentrations of the RA/RX Liposome on HCT116 cells tumor-bearing nude mice.

**16. Fig. S16.** H&E stained images of major organs for in vivo toxicity assay. Histological observation of the organs collected from HCT116 cells tumor-bearing nude mice after different treatments.

**17. Fig. S17.** The evaluation of levels of serum ALT, AST, creatinine and BUN in different groups after various administrations.

**18. Fig. S18.** Fluorescence images of activities of caspase-8 in HCT116 tumor-bearing mice with i.v. injection of caspase 8 probe Liposome, RX-0047 Liposome, RA-V Liposome and RA/RX Liposome recorded at 12 h.

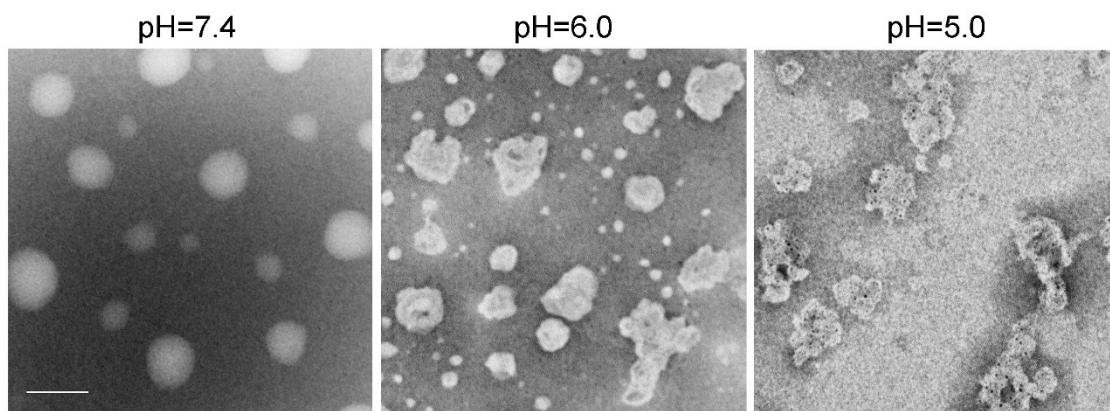

**Fig. S1.** TEM micrographs of the RA/RX Liposome at pH 5.0, 6.0 and 7.4. Scale bar: 200 nm.

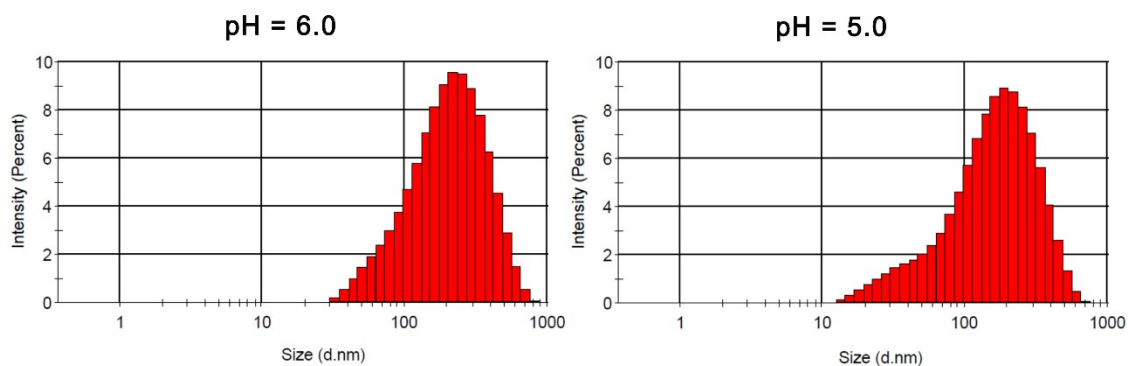

**Fig. S2.** Size distribution of the nanoparticle characterized by Malvern Instruments at 25 °C. (pH = 6.0:

151 ± 2.21 nm; pH = 5.0: 111.07 ± 2.35 nm)

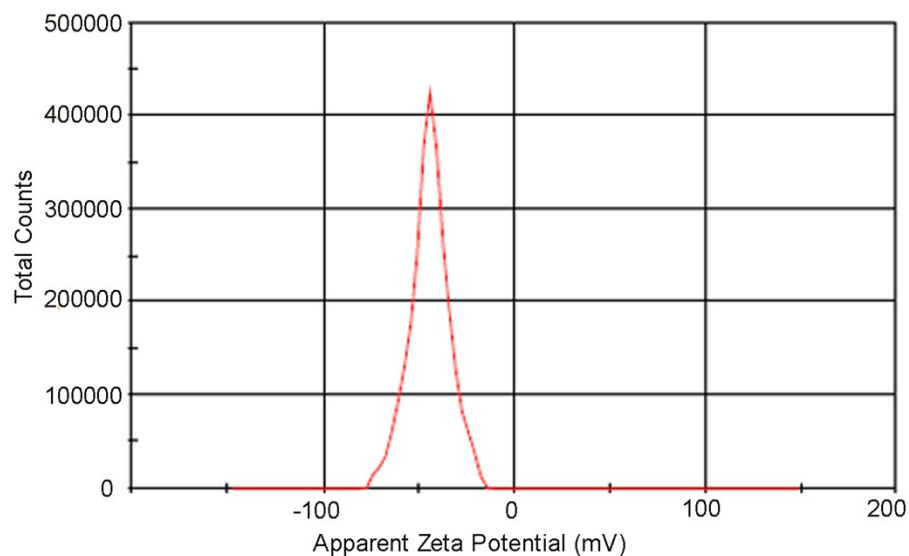

**Fig. S3.** Zeta distribution of the RA/RX Liposome (without anti-DR5 modification) were  $-44.2 \pm 0.1$  mV, compared with the RA/RX Liposome ( $-29.83 \pm 0.75$  mV), characterized by Malvern Instruments at 25 °C.

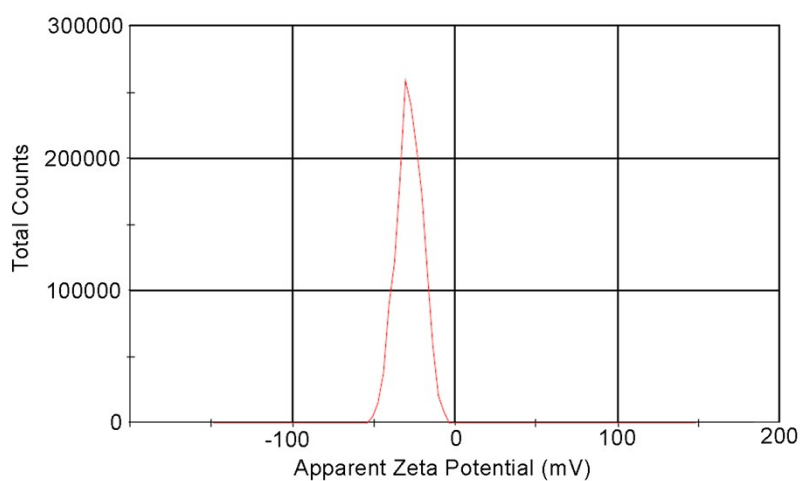

**Fig. S4.** Zeta distribution of the RA/RX Liposome were  $-29.83 \pm 0.75$  mV, compared with the RA/RX Liposome (without anti-DR5 modification) ( $-44.2 \pm 0.1$  mV), characterized by Malvern Instruments at 25 °C.

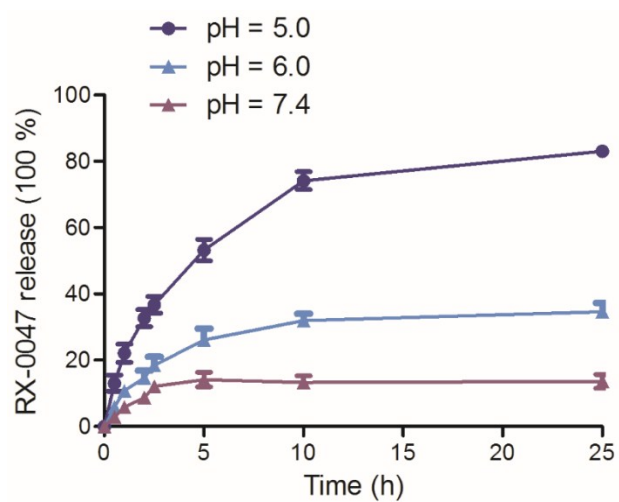

**Fig. S5.** In vitro release profiles of RX-0047 from the RA/RX Liposome at pH 5.0, 6.0 and 7.4. Data are given as mean  $\pm$  SD (n = 3).

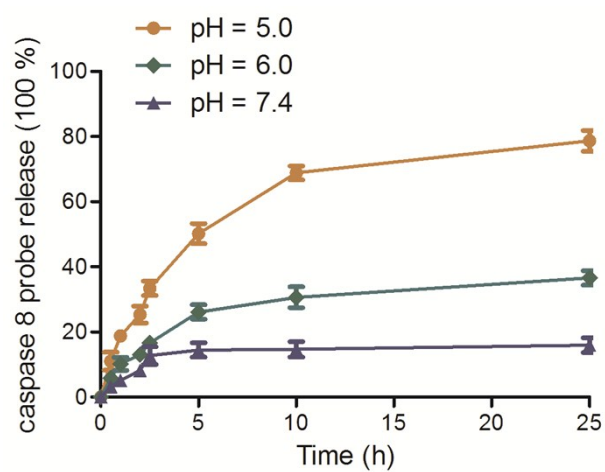

**Fig. S6.** In vitro release profiles of the caspase 8 probe from the RA/RX Liposome at pH 5.0, 6.0 and 7.4. Data are given as mean  $\pm$  SD (n = 3).

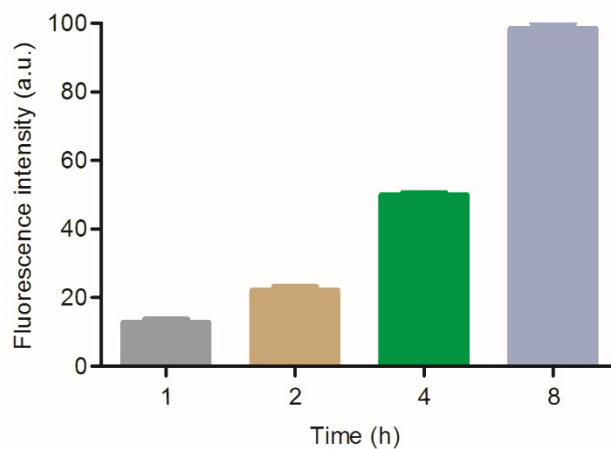

**Fig. S7.** Quantitative fluorescent intensities data of HCT116 cells fluorescence images in Fig. 3a. Data are given as mean  $\pm$  SD ( $n = 3$ ).

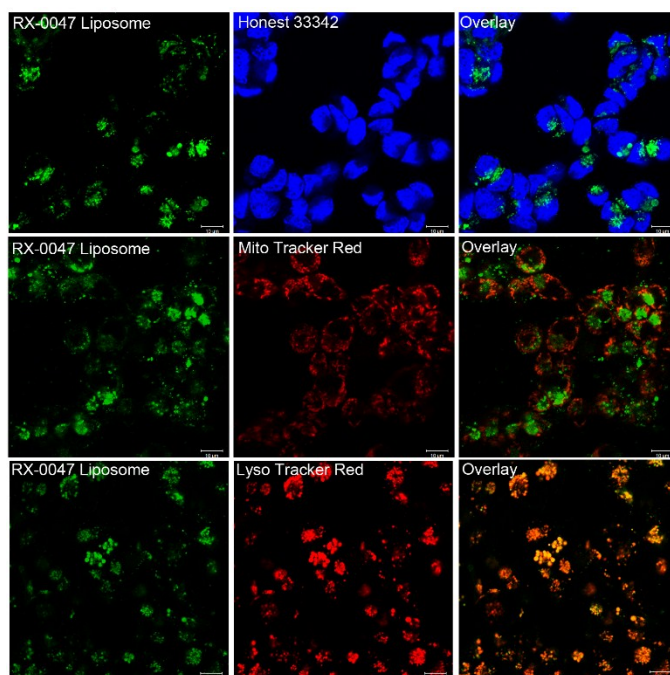

**Fig. S8.** Colocalization images of the RX-0047 Liposome in HCT116 cells. Cells were incubated with the RX-0047 Liposome for 3 h and then incubated with 100 nM Hoechst 33342, MitoTracker Red, or LysoTracker Red for 10 minutes. Scale bars: 10  $\mu$ m.

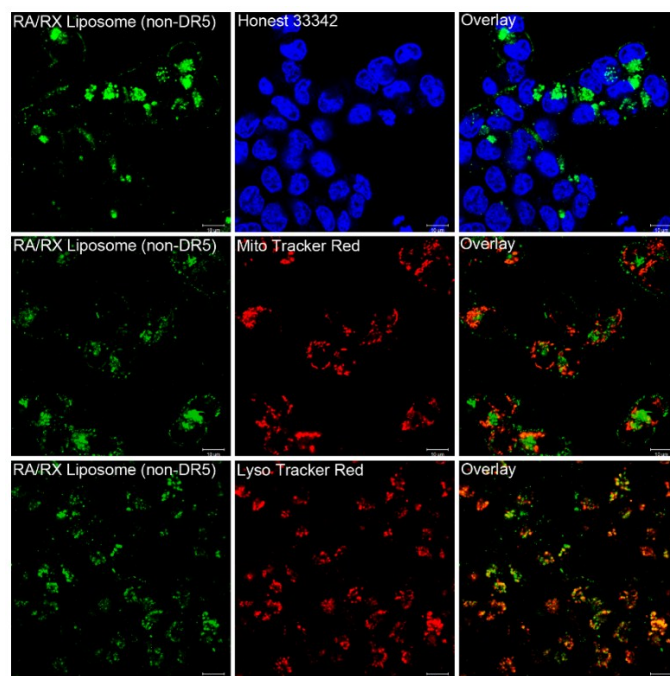

**Fig. S9.** Colocalization images of the RA/RX Liposome (non-DR5) in HCT116 cells. Cells were incubated with the RA/RX Liposome (non-DR5) for 3 h and then incubated with 100 nM Hoechst 33342, MitoTracker Red, or LysoTracker Red for 10 minutes. Scale bars: 10  $\mu$ m.

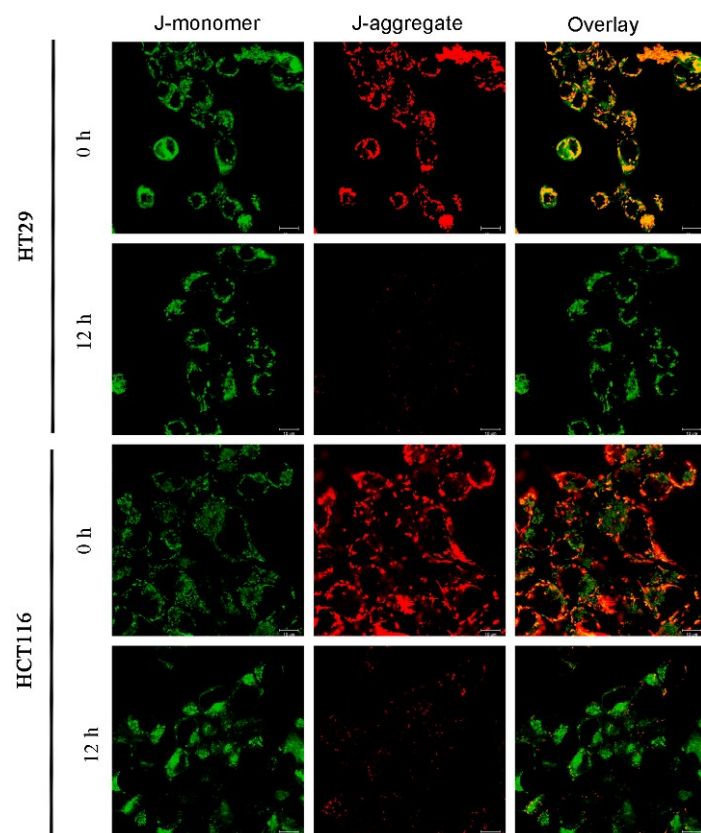

**Fig. S10.** Confocal fluorescence images of apoptosis by the JC-1 assay in HCT116 and HT29 cells treated with the RA/RX Liposome for 0 h or 12 h. Scale bars: 10  $\mu$ m.

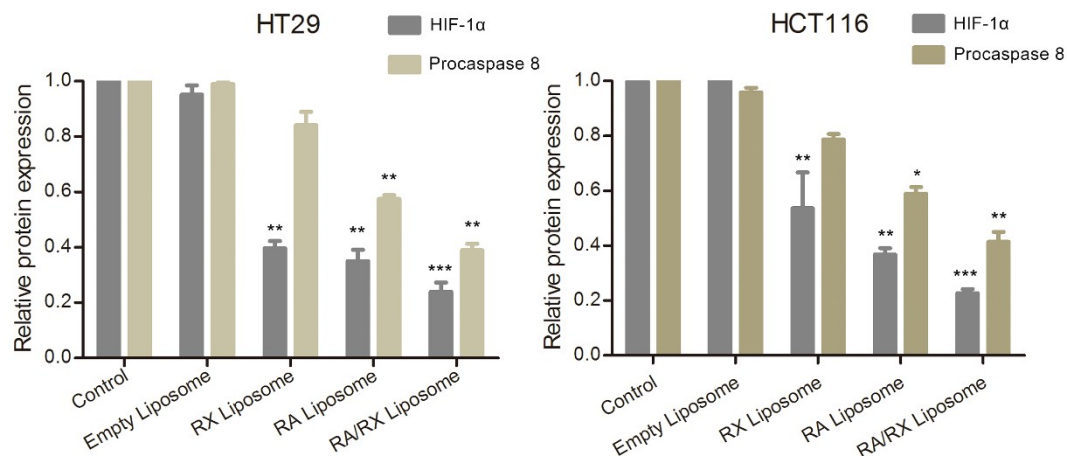

**Fig. S11.** The blots in Fig. 5d were analyzed by optical densitometry using Image J. Data are expressed as mean  $\pm$  SD. \* $P < 0.05$ , \*\* $P < 0.01$ , \*\*\* $P < 0.001$ , compared with control group.

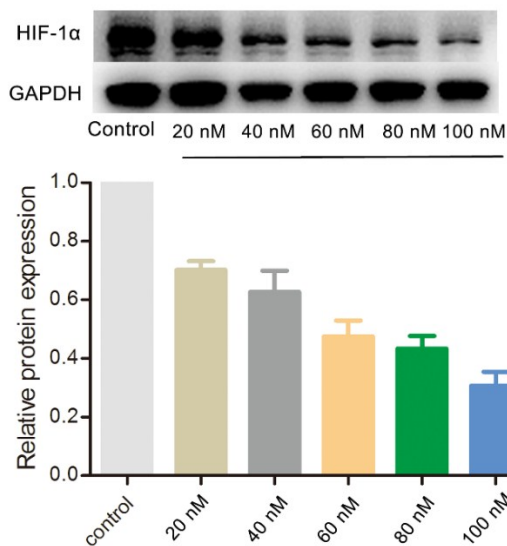

**Fig. S12.** The levels of HIF-1 $\alpha$  protein in cells upon treatments with different concentrations of the RX-0047 Liposome were also investigated, which were tested in the total cell lysates from HCT 116 cells.

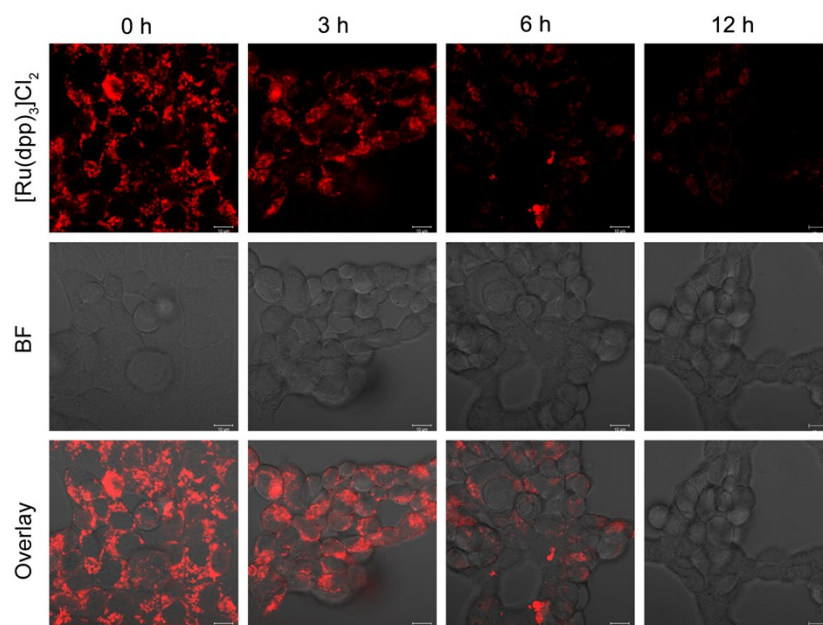

**Fig. S13.** Confocal fluorescence images showing increased intracellular O<sub>2</sub> level after treated with the RA/RX Liposome. HCT116 cells were incubated with 5  $\mu$ M [Ru(dpp)<sub>3</sub>]Cl<sub>2</sub> for 4 h, followed by incubation with the RA/RX Liposome for 0 h, 3 h, 6 h, 12 h. Scale bars: 10  $\mu$ m.

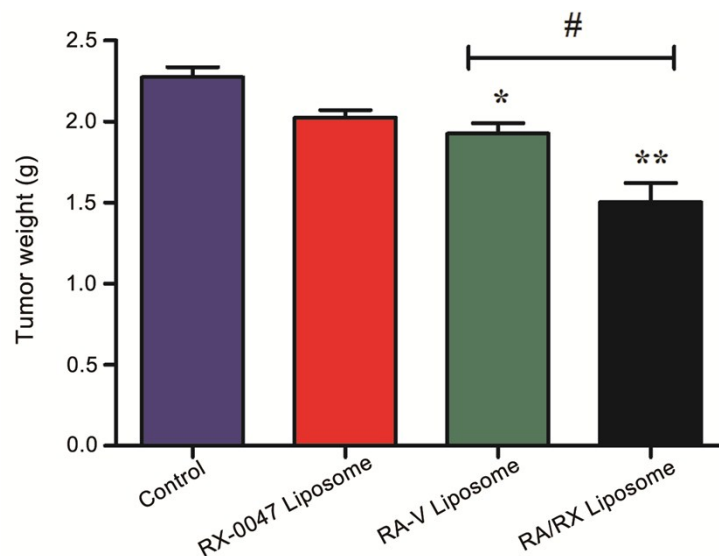

**Fig. S14.** Tumor weights of different groups of HCT116 cells tumor-bearing nude mice after various administrations. \* $P < 0.05$ , \*\* $P < 0.01$ , # $P < 0.05$ .

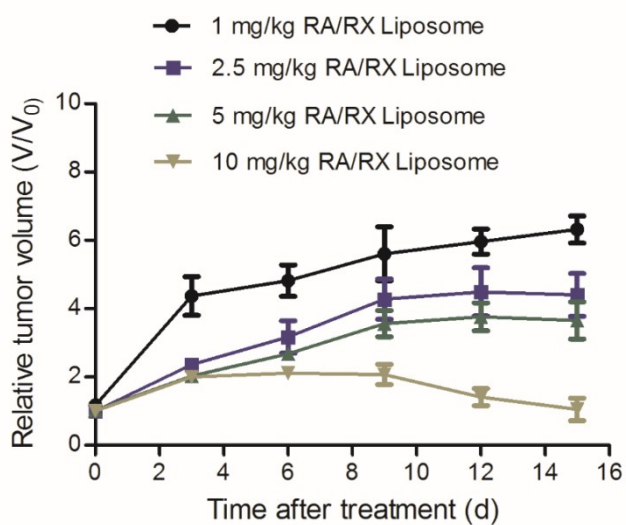

**Fig. S15.** Changes of relative tumor volume upon treatments with different concentrations of the RA/RX Liposome on HCT116 cells tumor-bearing nude mice.

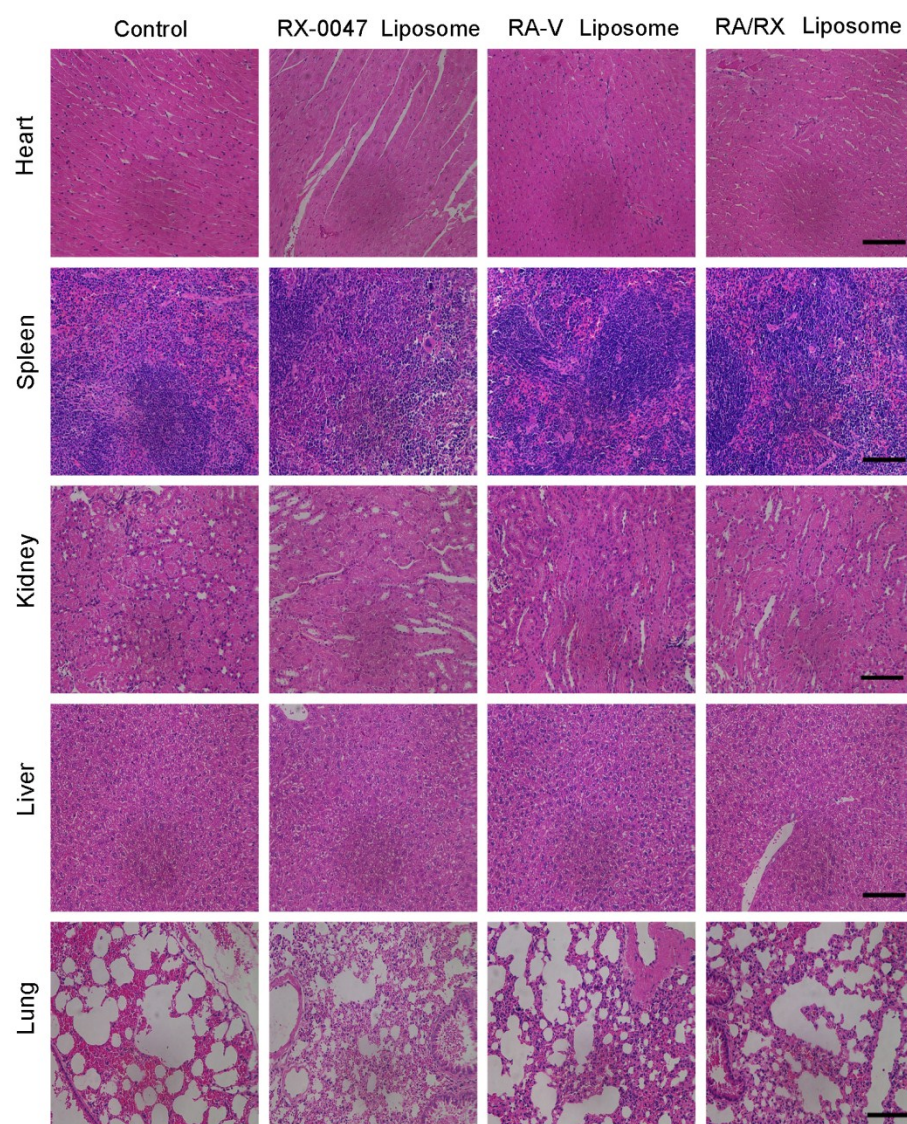

**Fig. S16.** H&E stained images of major organs for in vivo toxicity assay. Histological observation of the organs collected from HCT116 cells tumor-bearing nude mice after different treatments. No obvious organ damages were observed in major organs. Scale bars: 100  $\mu$ m.

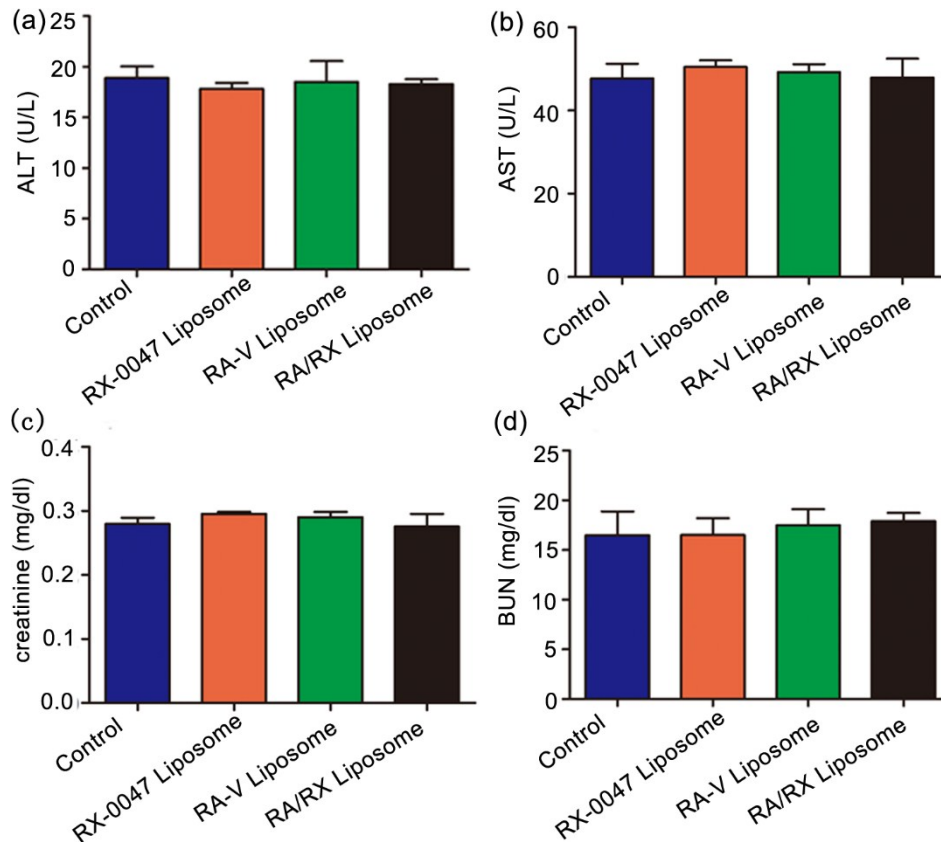

**Fig. S17.** The evaluation of levels of serum ALT, AST, creatinine and BUN in different groups after various administrations.

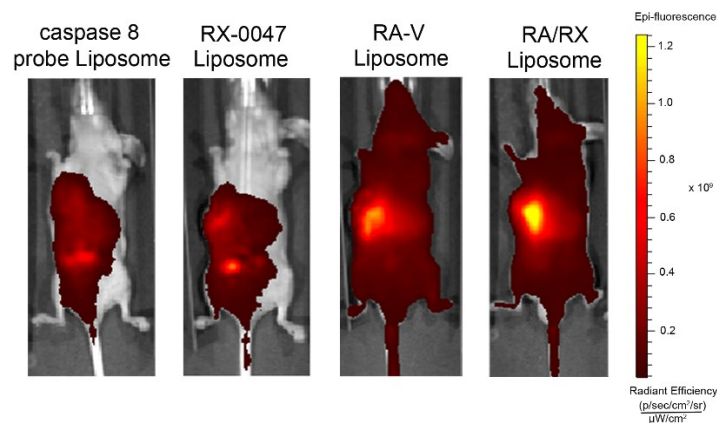

**Fig. S18.** Fluorescence images of activities of caspase-8 in HCT116 tumor-bearing nude mice with i.v. injection of caspase 8 probe Liposome, RX-0047 Liposome, RA-V Liposome and RA/RX Liposome recorded at 12 h.
